# Supplementary material for: Efficient utilization of photogenerated electrons and holes for photocatalytic selective organic syntheses in one reaction system using a narrow band gap CdS photocatalyst
Source: Royal Society of Chemistry journal article supplement (doi:10.1039/c6gc00572a), 2016-01-01
Supplement: c6gc00572a1.pdf [file c6gc00572a1.pdf]

## Electronic Supporting Information

### **An efficient utilization of the photogenerated electrons and holes for photocatalytic selective organic syntheses in one reaction system through narrow band gap CdS photocatalyst**

**Xiaofeng Ning<sup>a</sup>, Sugang Meng<sup>a\*</sup>, Xianliang Fu<sup>a</sup>, Xiangju Ye<sup>b</sup>, Shifu Chen<sup>a,b\*</sup>**

<sup>a</sup> Department of Chemistry, Huaibei Normal University, Anhui Huaibei, 235000, People's Republic of China.

<sup>b</sup> Department of Chemistry, Anhui Science and Technology University, Anhui Fengyang, 233100, People's Republic of China.

\* Corresponding author, Tel: +86-550-6732001, Fax: +86-550-6732001. E-mail:

[chshifu@chnu.edu.cn](mailto:chshifu@chnu.edu.cn)

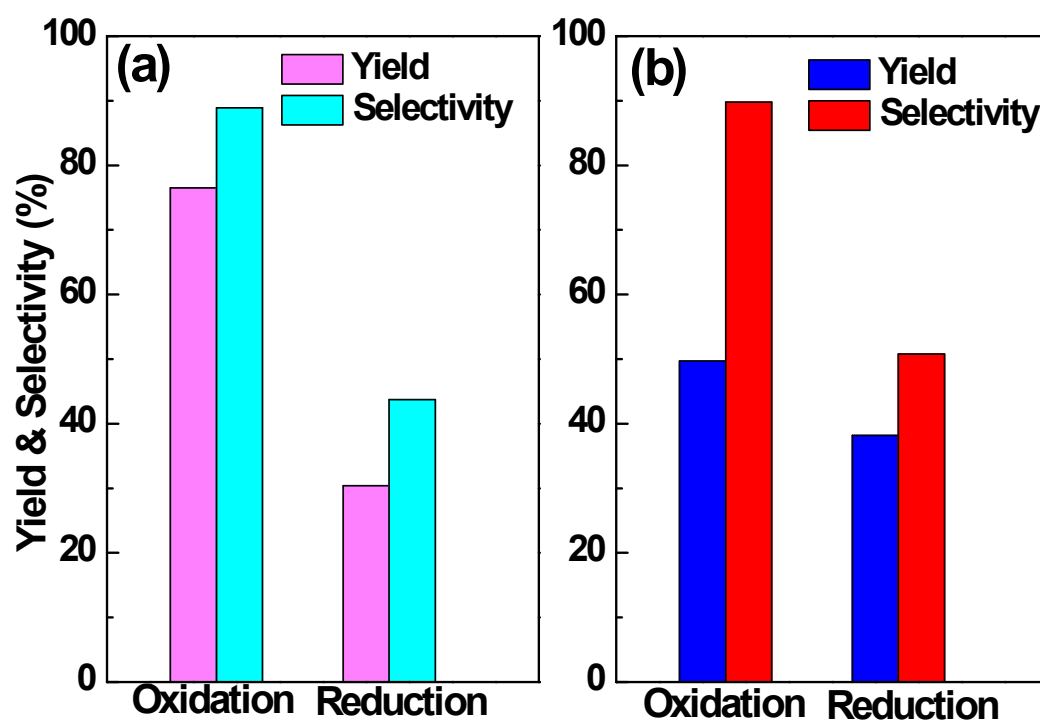

Fig. S1 The activity of CdS-G for photocatalytic (a): oxidation of benzyl alcohol into benzaldehyde and reduction of nitrobenzene into aniline; (b): oxidation of benzyl alcohol into benzaldehyde and reduction p-chloronitrobenzene into p-chloroaniline under visible light irradiation for 4 h.

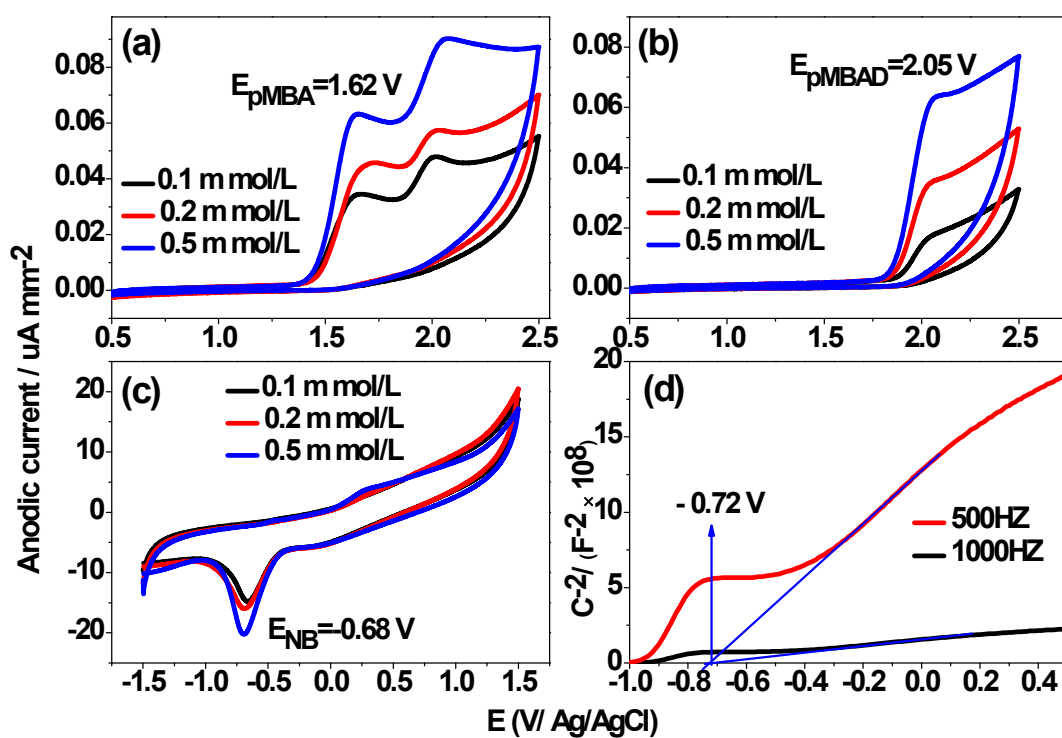

Fig. S2 The cyclic voltammogram of (a) pMBA, (b) pMBAD and (c) NB with different concentrations (0.1, 0.2, and 0.5 mmol/L), (d) Mott-Schottky plots for the CdS-G electrodes.

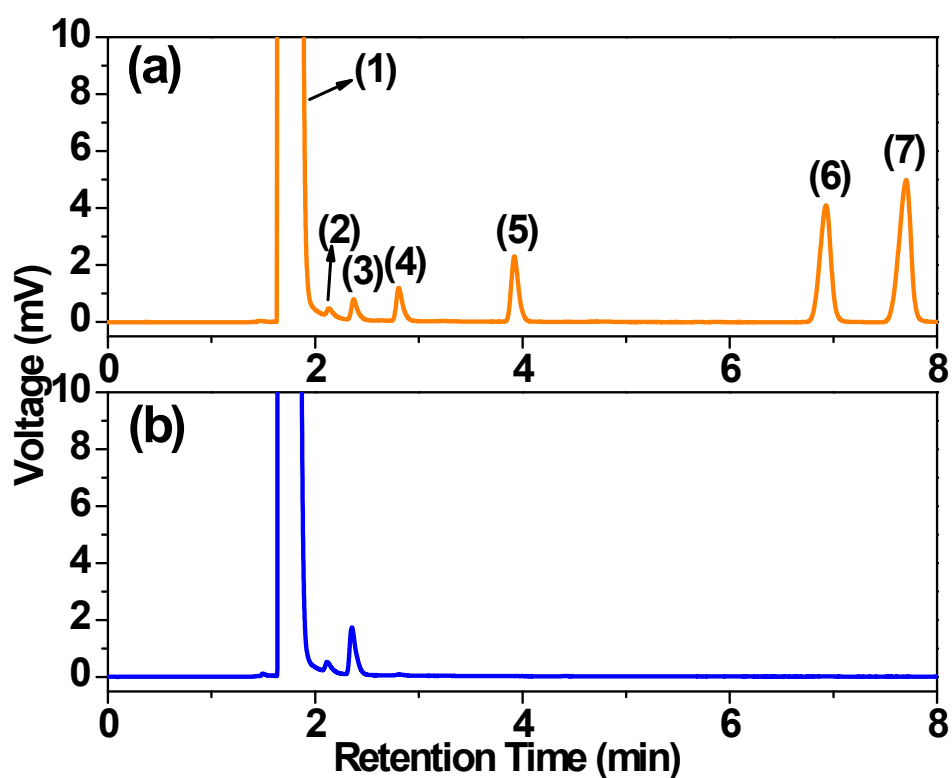

Fig. S3 The GC spectra of (a) the reaction system was irradiated for 0.5 h and (b) BTf solvent contained NSB to verify the existence of NSB in the reaction process.

- (1): Benzotrifluoride solvent (BTf);
- (2): Impurity in BTf solvent;
- (3): Nitrosobenzene (NSB);
- (4): Aniline (AL);
- (5): Nitrobenzene (NB);
- (6): p-methoxybenzyl alcohol (pMBA);
- (7) p-methoxybenzaldehyde (pMBAD).
